# Supplementary material for: Price and Variability in Hospital Charges for Generic Indomethacin Suppositories
Source: PubMed Central journal article supplement (PMC11428000; doi:10.1001/jamanetworkopen.2024.35528), 2024-09-26

# Supplemental Online Content

Feder NM, Hernandez I, Feldman WB, et al. Price and variability in hospital charges for generic indomethacin suppositories. *JAMA Netw Open*. 2024;7(9):e2435528.  
doi:10.1001/jamanetworkopen.2024.35528

## **eAppendix.** Supplementary Materials

This supplemental material has been provided by the authors to give readers additional information about their work.

## **eAppendix. Supplementary Materials**

Inclusion/Exclusion of hospitals: To identify the 50 hospitals in our final cohort, we reviewed charge data from a total of 95 hospitals. Of the 95 hospitals, 93 (98%) had a standard charge file on their website, and 58 (61%) had entries for indomethacin suppositories. We then excluded eight (8%) hospitals that had more than one entry for indomethacin suppositories or did not contain a cash price. The final list of included and excluded hospitals and their associated bed-sizes is in **eTable 1** and **eTable 2**, respectively, below. Median bed sizes were similar between included and excluded hospitals. Excluded hospitals were more likely to be in Florida, NY, and CA (**Figure 1** below).

**eTable 1:** List of included hospitals

| Included                             |            |                |
|--------------------------------------|------------|----------------|
| Hospital Name                        | State Code | Number of Beds |
| METHODIST HOSPITAL                   | TX         | 1,742          |
| NYU LANGONE HOSPITALS                | NY         | 1,571          |
| CLEVELAND CLINIC HOSPITAL            | OH         | 1,326          |
| YALE-NEW HAVEN HOSPITAL              | CT         | 1,306          |
| METHODIST H/C MEMPHIS HOSPT.         | TN         | 1,295          |
| BARNES-JEWISH HOSPITAL               | MO         | 1,273          |
| INDIANA UNIVERSITY HEALTH            | IN         | 1,265          |
| LEHIGH VALLEY                        | PA         | 1,203          |
| CHRISTIANA CARE HEALTH SYSTEM        | DE         | 1,180          |
| LONG ISLAND JEWISH MEDICAL CENTER    | NY         | 1,166          |
| MAYO CLINIC HOSPITAL ROCHESTER       | MN         | 1,143          |
| UPMC - PRESBYTERIAN SHADYSIDE        | PA         | 1,141          |
| CAROLINAS MEDICAL CENTER             | NC         | 1,134          |
| UNIVERSITY OF ALABAMA HOSPITAL       | AL         | 1,129          |
| MEMORIAL HERMANN TEXAS MEDICAL CNTR  | TX         | 1,076          |
| WILLIAM BEAUMONT HOSPITAL- ROYAL OAK | MI         | 1,026          |
| OCHSNER CLINIC FOUNDATION            | LA         | 1,024          |
| THE JOHNS HOPKINS HOSPITAL           | MD         | 999            |
| UF HEALTH SHANDS                     | FL         | 965            |
| UNIV OF MI HOSPITALS & HLTH CTRS     | MI         | 951            |
| UNIVERSITY OF KANSAS HOSPITAL        | KS         | 940            |
| HUNTSVILLE HOSPITAL                  | AL         | 904            |
| TAMPA GENERAL HOSPITAL               | FL         | 898            |
| TEXAS CHILDRENS HOSPITAL             | TX         | 861            |
| BAPTIST MEM HOSPITAL MEMPHIS         | TN         | 848            |
| UNIVERSITY OF MARYLAND MED SYS       | MD         | 846            |
| MERCY HOSPITAL - ST. LOUIS           | MO         | 843            |
| SHARP MEMORIAL HOSPITAL              | CA         | 832            |
| THE MOSES H. CONE MEMORIAL HOSPITAL  | NC         | 822            |
| MEDICAL CITY DALLAS                  | TX         | 819            |
| NORTH CAROLINA BAPTIST HOSPITAL      | NC         | 815            |
| OU MEDICAL CENTER                    | OK         | 812            |
| BRIGHAM AND WOMENS HOSPITAL          | MA         | 812            |
| THE UNIVERSITY OF TEXAS MEDICAL BR.  | TX         | 810            |
| DALLAS CO. HOSP. DIST.               | TX         | 801            |
| INOVA FAIRFAX HOSPITAL               | VA         | 794            |
| COXHEALTH                            | MO         | 791            |
| PARKVIEW HOSPITAL                    | IN         | 791            |
| WILLIS-KNIGHTON HEALTH SYSTEMS       | LA         | 790            |
| UOFL HEALTH-LOUISVILLE               | KY         | 789            |
| NORTH SHORE UNIVERSITY HOSPITAL      | NY         | 782            |
| OUR LADY OF THE LAKE RMC             | LA         | 777            |
| MEMORIAL REGIONAL HOSPITAL           | FL         | 772            |
| SOUTH TEXAS HEALTH SYSTEM            | TX         | 770            |
| RIVERSIDE METHODIST HOSPITAL         | OH         | 750            |
| ALBANY MEDICAL CENTER HOSPITAL       | NY         | 743            |
| MISSION HOSPITAL INC                 | NC         | 733            |
| UNIVERSITY OF IOWA HOSP & CLINICS    | IA         | 732            |
| GHS GREENVILLE MEMORIAL HOSPITAL     | SC         | 728            |
| MERCY HOSPITAL SOUTH                 | MO         | 720            |
|                                      |            |                |
|                                      | Q1         | 791            |
|                                      | Median     | 847            |
|                                      | Q3         | 1133           |

**eTable 2:** List of excluded hospitals

| Excluded                             |            |                |
|--------------------------------------|------------|----------------|
| Hospital Name                        | State Code | Number of Beds |
| ADVENTHEALTH ORLANDO                 | FL         | 2,791          |
| NEW YORK PRESBYTERIAN HOSPITAL       | NY         | 2,334          |
| ORLANDO HEALTH                       | FL         | 1,600          |
| JACKSON MEMORIAL                     | FL         | 1,504          |
| NORTON HOSPITALS INC                 | KY         | 1,465          |
| BAPTIST HEALTH SYSTEM                | TX         | 1,451          |
| MONTEFIORE MEDICAL CENTER            | NY         | 1,426          |
| ST. JOSEPHS HOSPITAL                 | FL         | 1,382          |
| SPECTRUM HEALTH HOSPITALS            | MI         | 1,148          |
| MOUNT SINAI HOSPITAL                 | NY         | 1,080          |
| VANDERBILT UNIVERSITY MEDICAL CENTER | TN         | 1,056          |
| DUKE UNIVERSITY HOSPITAL             | NC         | 1,048          |
| THE OHIO STATE UNIVERSITY HOSPITAL   | OH         | 1,016          |
| METROPOLITAN STATE HOSPITAL          | CA         | 1,004          |
| THE METHODIST HOSPITAL               | TX         | 1,003          |
| HOSPITAL OF THE UNIV OF PENNA        | PA         | 1,003          |
| MASSACHUSETTS GENERAL HOSPITAL       | MA         | 995            |
| UNIVERSITY HOSPITAL                  | KY         | 962            |
| KALEIDA HEALTH                       | NY         | 954            |
| AURORA HEALTH CARE METRO INC.        | WI         | 915            |
| FORSYTH MEMORIAL HOSPITAL INC        | NC         | 912            |
| NORTHWESTERN MEMORIAL HOSPITAL       | IL         | 901            |
| SAINT FRANCIS HOSPITAL               | OK         | 883            |
| BAPTIST MEDICAL CENTER               | FL         | 882            |
| CEDARS-SINAI MEDICAL CENTER          | CA         | 882            |
| MIAMI VALLEY HOSPITAL                | OH         | 878            |
| THOMAS JEFFERSON UNIV. HOSPITAL      | PA         | 868            |
| PITT COUNTY MEMORIAL HOSPITAL        | NC         | 847            |
| BAYLOR UNIVERSITY MEDICAL CTR        | TX         | 844            |
| BAPTIST HOSPITAL                     | FL         | 838            |
| CHARLESTON AREA MEDICAL CENTER INC.  | WV         | 813            |
| SANTA CLARA VALLEY MEDICAL CENTER    | CA         | 812            |
| UNIVERSITY OF NORTH CAROLINA HOSP.   | NC         | 811            |
| UCSF MEDICAL CENTER                  | CA         | 809            |
| ASCENSION ST. VINCENT HOSPITAL       | IN         | 799            |
| BAPTIST HEALTH MEDICAL CENTER - LR   | AR         | 785            |
| LAKELAND REGIONAL MED CTR            | FL         | 774            |
| LEE MEMORIAL HOSPITAL                | FL         | 768            |
| TEMPLE UNIVERSITY HOSPITAL           | PA         | 761            |
| COMMUNITY REGIONAL MEDICAL CENTER    | CA         | 761            |
| STRONG MEMORIAL HOSPITAL             | NY         | 757            |
| NORTH SHORE MEDICAL CENTER AND FMC   | FL         | 748            |
| STONY BROOK UNIVERSITY HOSPITAL      | NY         | 725            |
| MEDICAL UNIVERSITY OF SOUTH CAROLINA | SC         | 722            |
| NORTHSIDE HOSPITAL                   | GA         | 721            |
|                                      |            |                |
|                                      | Q1         | 809            |
|                                      | Median     | 883            |
|                                      | Q3         | 1048           |

**Figure 1:** Count of hospitals included (orange) and excluded (blue) from analysis, by state

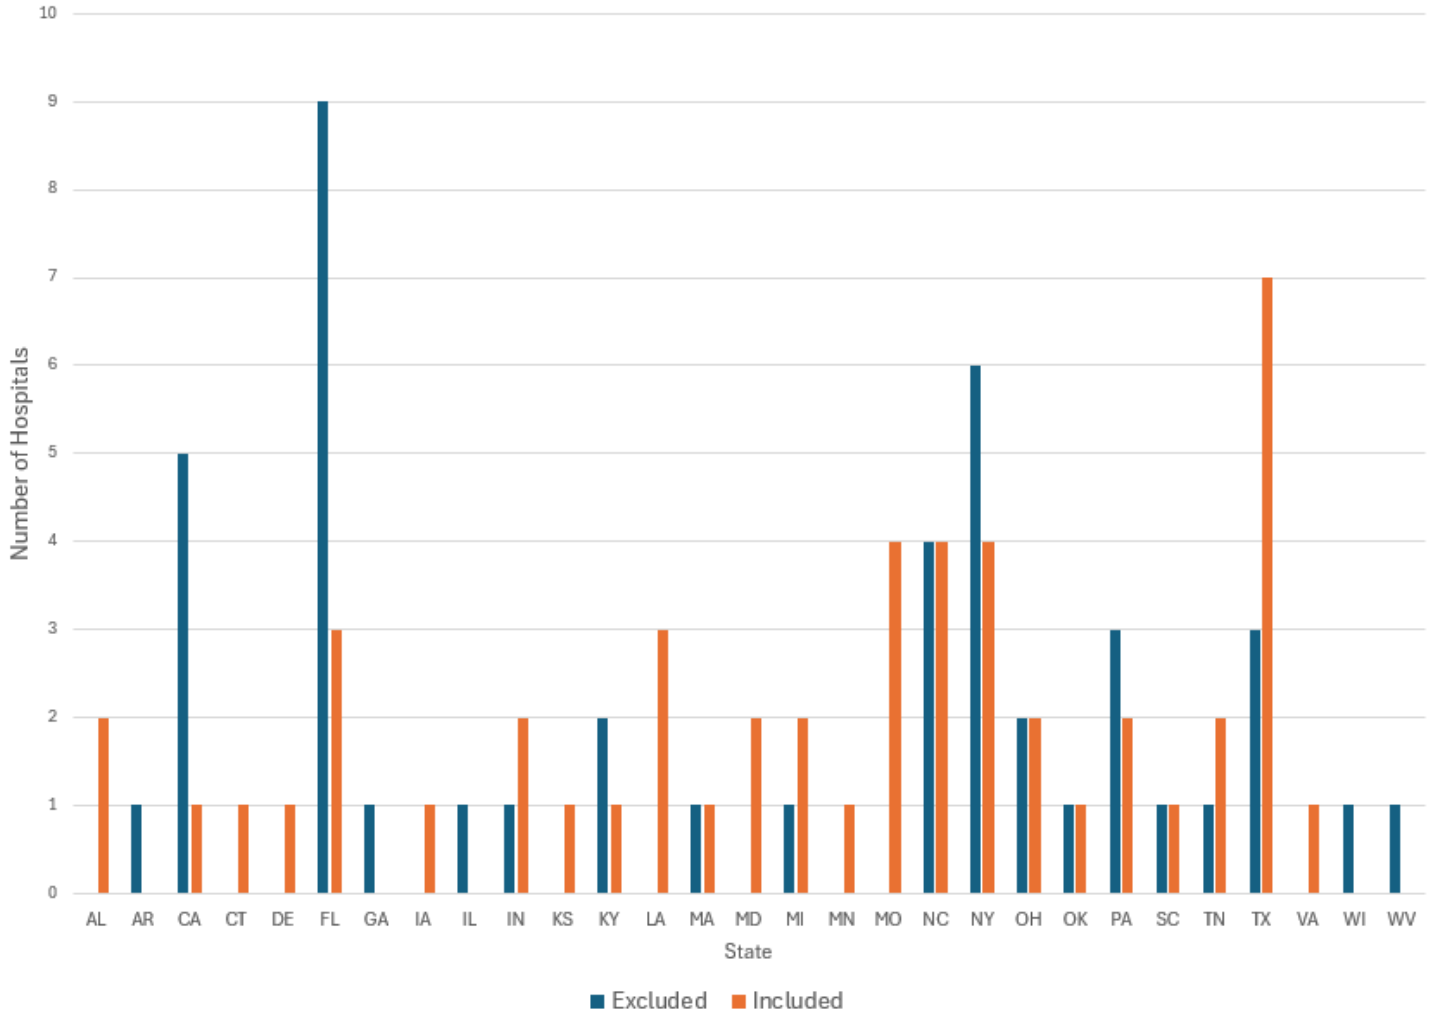

Supplement: jamanetwopen-e2435528-s001.pdf [file jamanetwopen-e2435528-s001.pdf]
