# Supplementary material for: Price and Variability in Hospital Charges for Generic Indomethacin Suppositories
Source: PubMed Central journal article supplement (PMC11428000; doi:10.1001/jamanetworkopen.2024.35528), 2024-09-26
Supplement: jamanetwopen-e2435528-s002.pdf [file jamanetwopen-e2435528-s002.pdf]

## Data Sharing Statement

Feder. Price and Variability in Hospital Charges for Generic Indomethacin Suppositories. *JAMA Netw Open*. Published September 26, 2024. doi:10.1001/jamanetworkopen.2024.35528

### Data

**Data available:** No

### Additional Information

**Explanation for why data not available:** Hospital charge data are publicly available. A dataset can be made available for other researcher use if requested. The drug pricing data are proprietary and cannot be shared
